# Supplementary material for: Synthesis of carbon-coated, porous and water-dispersive Fe3O4 nanocapsules and their excellent performance for heavy metal removal applications
Source: Royal Society of Chemistry journal article supplement (doi:10.1039/c2dt12312f), 2012-01-01
Supplement: c2dt12312f.pdf [file c2dt12312f.pdf]

# Synthesis of Carbon-coated, Porous and water-dispersive Fe<sub>3</sub>O<sub>4</sub> Nanocapsules and Their Excellent Performance for Heavy Metal Removal Applications

Kai Cheng, Yu-Mei Zhou, Qian-Wang Chen, Hai-Bo Hu, Hao Zhong, Xianyi Hu, Xiang-Kai Kong

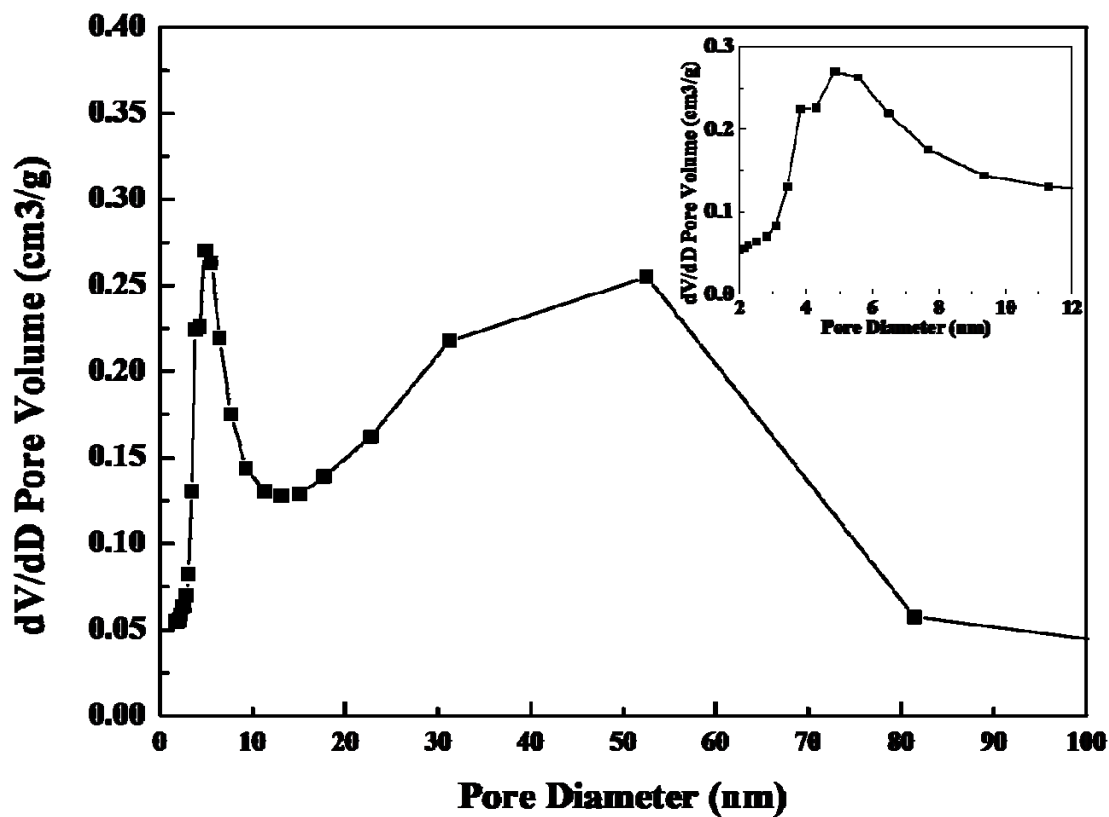

Fig. S1 BJH pore plot of the nanocapsules.

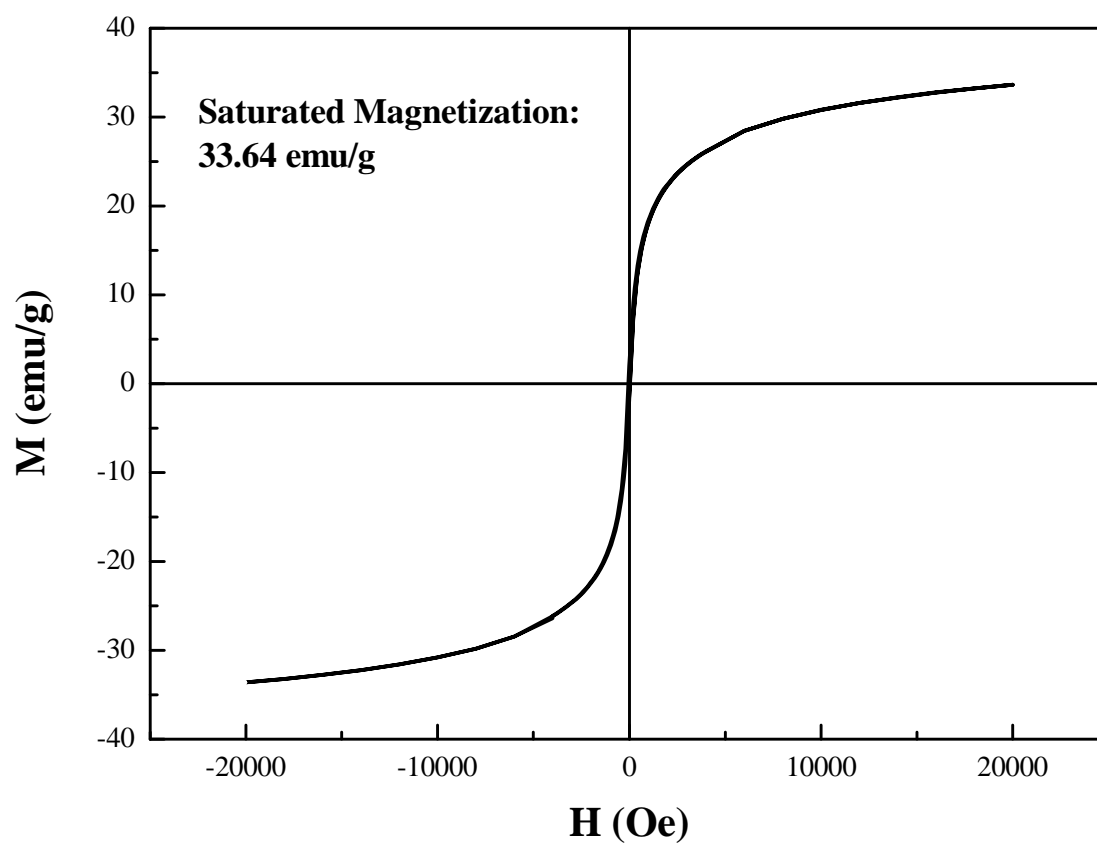

**Fig. S2** M-H hysteresis loops of the  $\text{SiO}_2@Fe_3O_4@C$  nanoparticles.

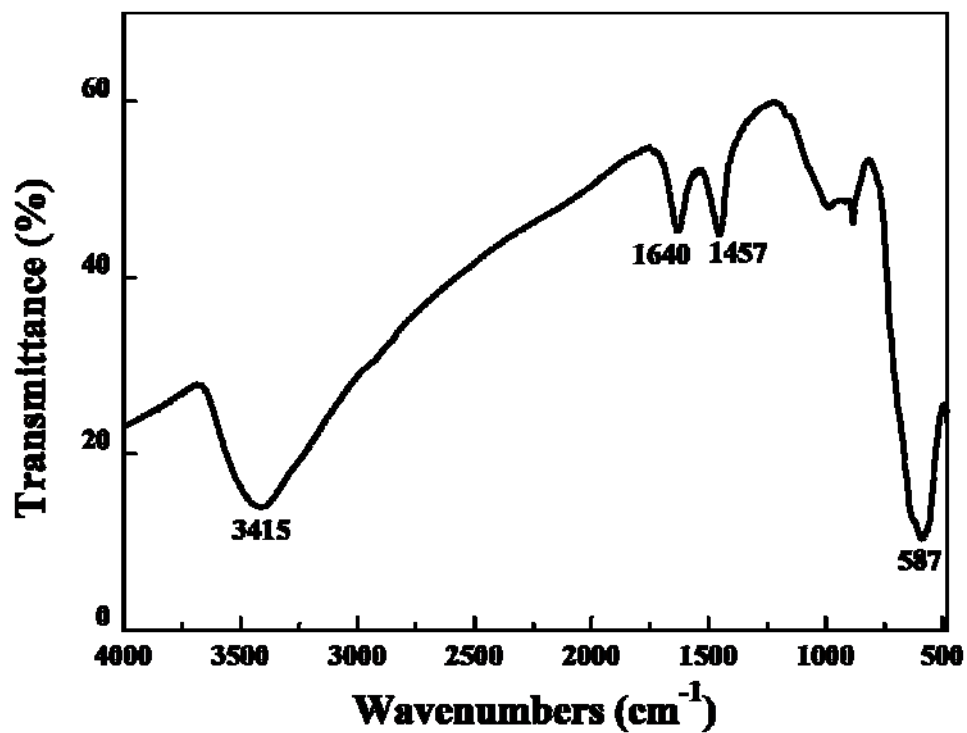

Fig. S3 FT-IR spectra of as prepared sample.

| <b>Metal</b>                | <b>Pb</b>         | <b>Cd</b> | <b>Zn</b>         | <b>Cu</b>         | <b>Ni</b> | <b>Co</b> | <b>Mn</b> |
|-----------------------------|-------------------|-----------|-------------------|-------------------|-----------|-----------|-----------|
| <b>C<sub>o</sub> (mg/L)</b> | 1.0               | 1.0       | 1.0               | 1.0               | 1.0       | 1.0       | 1.0       |
| <b>C<sub>t</sub> (mg/L)</b> | <10 <sup>-3</sup> | 0.052     | <10 <sup>-3</sup> | <10 <sup>-3</sup> | 0.089     | 0.020     | 0.066     |

**Table S1** Detailed analysis of an adsorption experiment with different heavy metals (C<sub>o</sub>: original concentration; C<sub>t</sub>: concentration after treatment, detection limit by ICP-AES: 1 ppb).

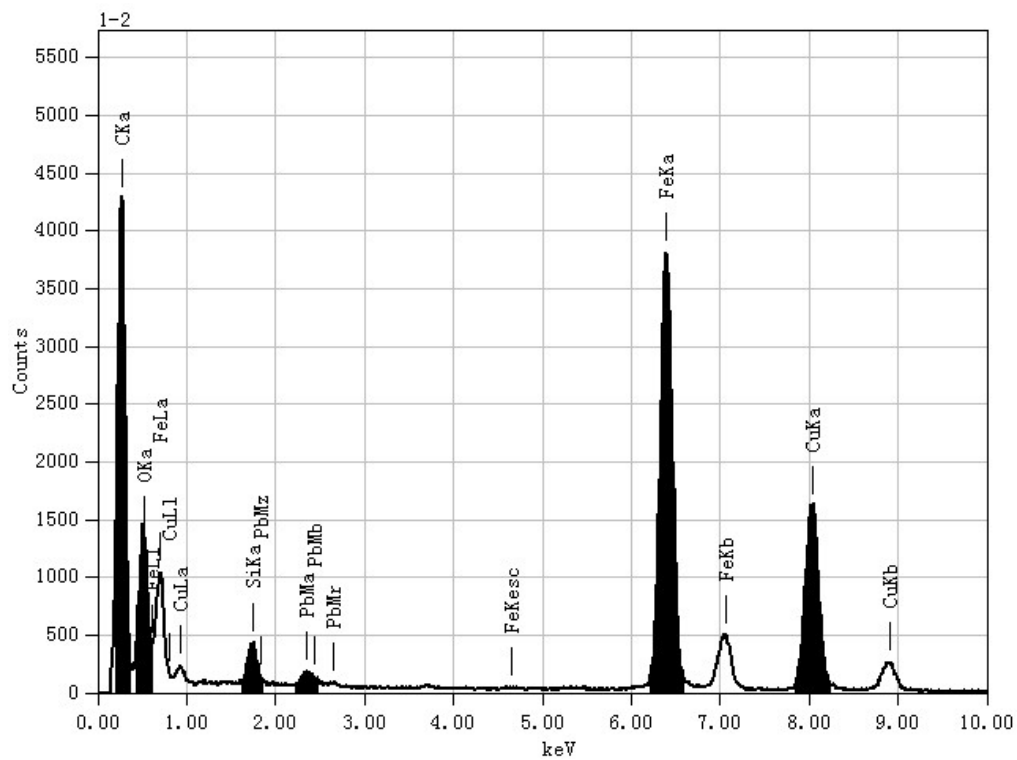

**Fig. S4** EDS of single nanocapsules.

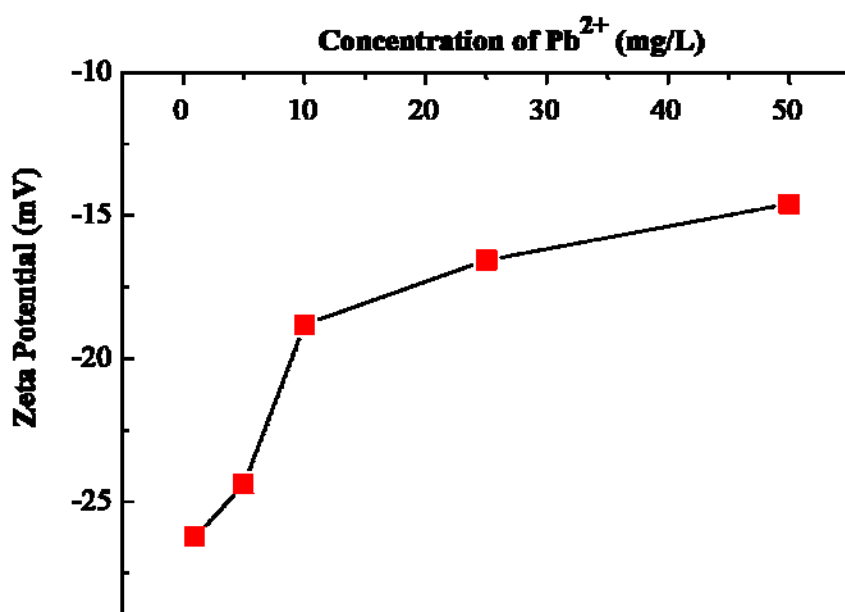

**Fig. S5** zeta potential of nanocapsules after uptake different volume of Pb<sup>2+</sup>.

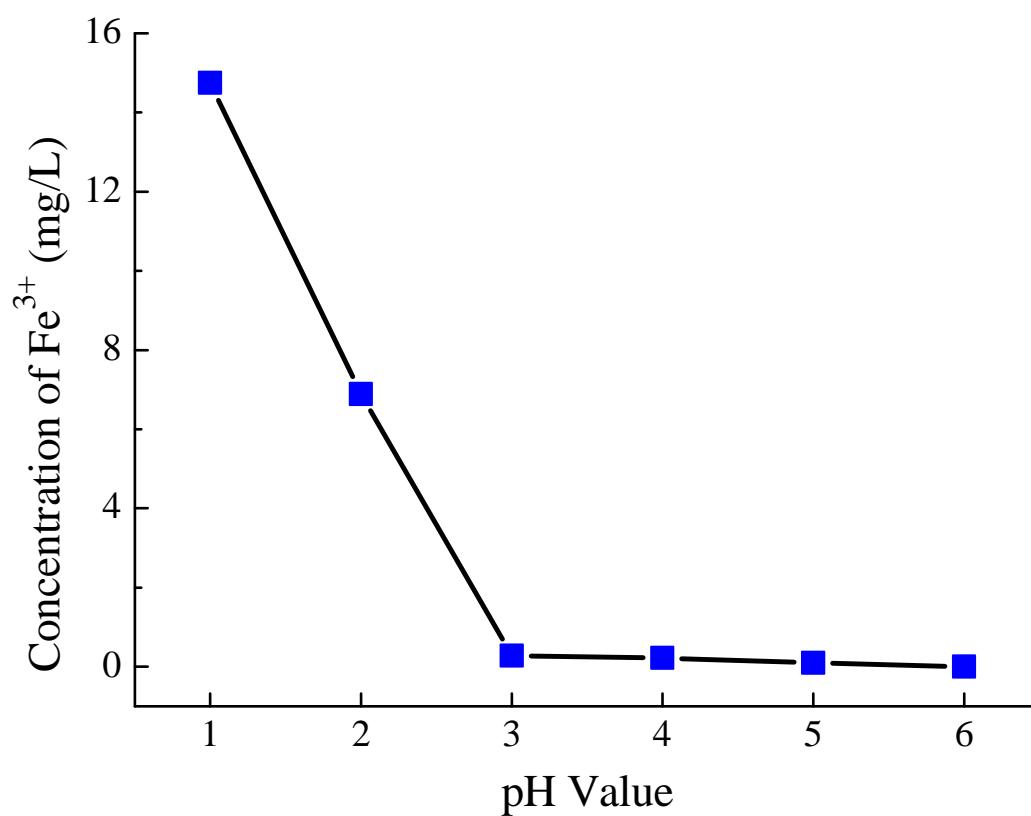

**Fig. S6** The concentration of dissolved iron in different pH value solution.
